# Supplementary material for: Tailoring an efficient computational methodology for studying ligand interactions with heavy radiometals in solution: the case of radium
Source: Royal Society of Chemistry journal article supplement (doi:10.1039/d3nj02103c), 2023-01-01
Supplement: d3nj02103c1.pdf [file d3nj02103c1.pdf]

# Tailoring an efficient computational methodology for studying ligand interactions with heavy radiometals in solution: the case of radium

*Hamissou Mohaman,<sup>a,b</sup> Steffen Happel,<sup>c</sup> Gilles Montavon<sup>b</sup> and Nicolas Galland<sup>\*a</sup>*

<sup>a</sup> Nantes Université, CNRS, CEISAM UMR 6230, F-44000 Nantes, France.

<sup>b</sup> IMT Atlantique, CNRS, SUBATECH UMR 6457, F-44307 Nantes, France.

<sup>c</sup> TRISKEM INTERNATIONAL, F-35170 Bruz, France.

## Supporting Information

|                                                                                                                                                            |           |
|------------------------------------------------------------------------------------------------------------------------------------------------------------|-----------|
| <b>I. Figures</b>                                                                                                                                          | <b>2</b>  |
| <b>II. Tables</b>                                                                                                                                          | <b>6</b>  |
| <b>III. Computed structures</b>                                                                                                                            | <b>10</b> |
| Computed structures at the sr-CCSD(T)/ACVTZ level of theory.                                                                                               | 10        |
| Computed structure at the SMD sr-MN15/ACVDZ level of theory for the most stable conformations of [RaEDTA(H <sub>2</sub> O) <sub>1</sub> Na] <sup>-</sup> . | 11        |
| Computed structure at the SMD sr-MN15/ACVDZ level of theory for the most stable conformations of [Ra⋯18C6] <sup>2+</sup> .                                 | 12        |
| Computed structure at the SMD sr-MN15/ACVDZ level of theory for the most stable conformations of [Ra⋯21C7] <sup>2+</sup> .                                 | 13        |
| Computed structure at the SMD sr-MN15/ACVDZ level of theory for the most stable conformations of Ra(macropa).                                              | 15        |

## I. Figures

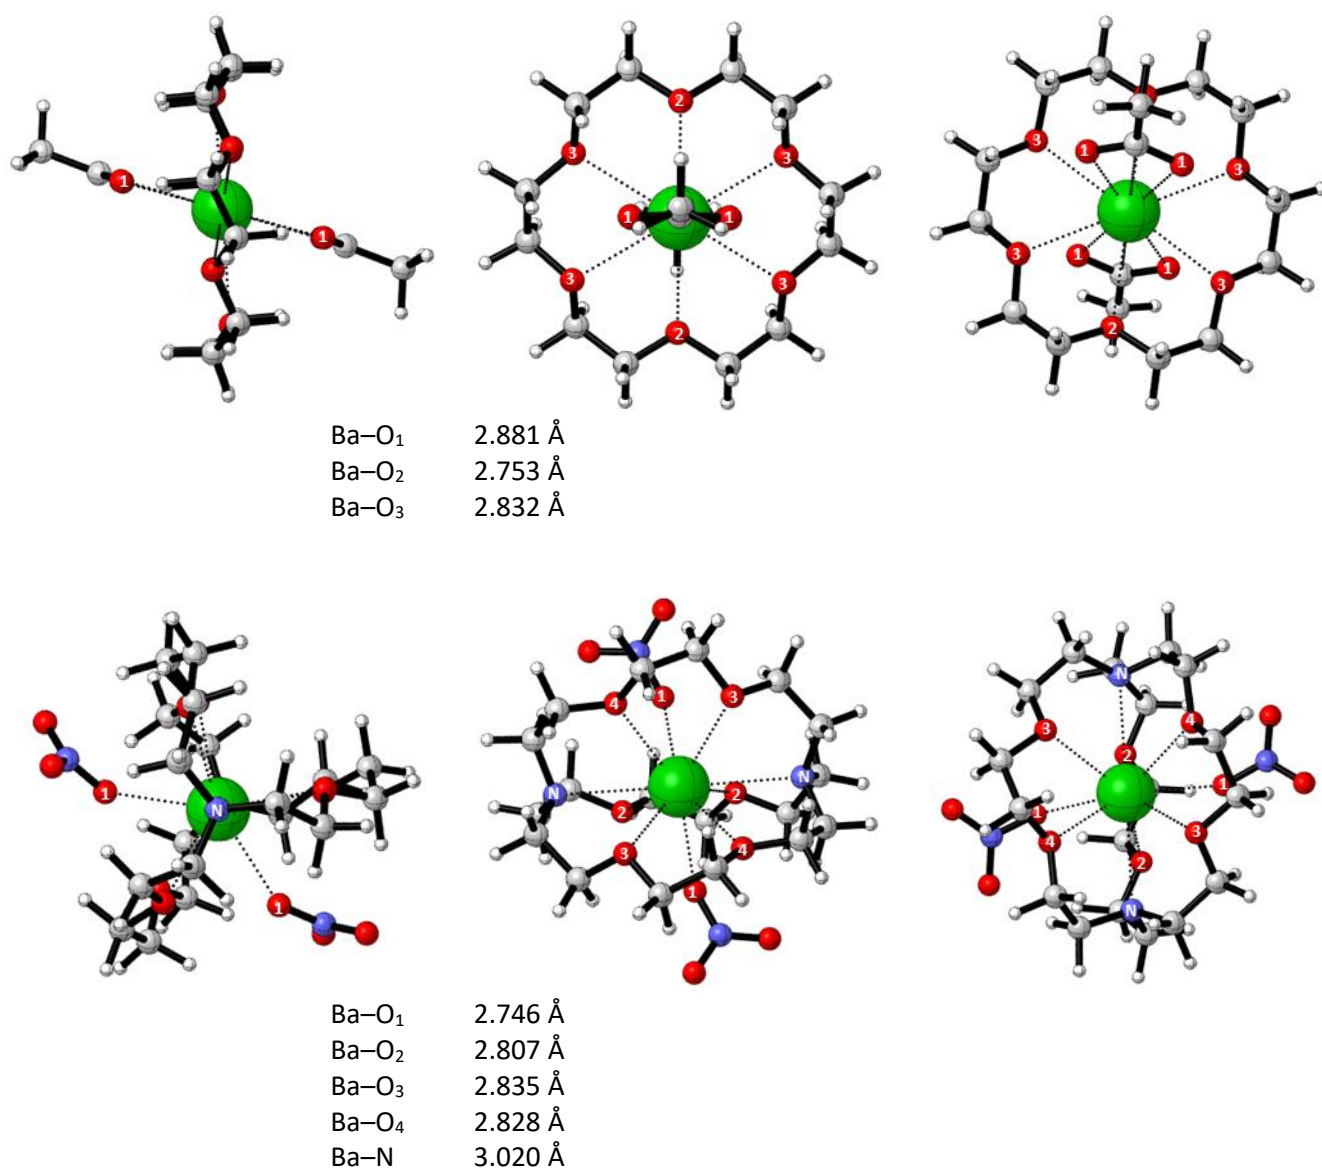

**Fig. S1** Different views of the crystallographic reference structures of Ba(II) complexed, corresponding to the CSD entries BIWBAK (top) and AZELOG (bottom). The given interaction distances have been averaged according to the symmetry point groups yield by DFT calculations:  $C_{2h}$  symmetry for BIWBAK and  $C_2$  symmetry for AZELOG.

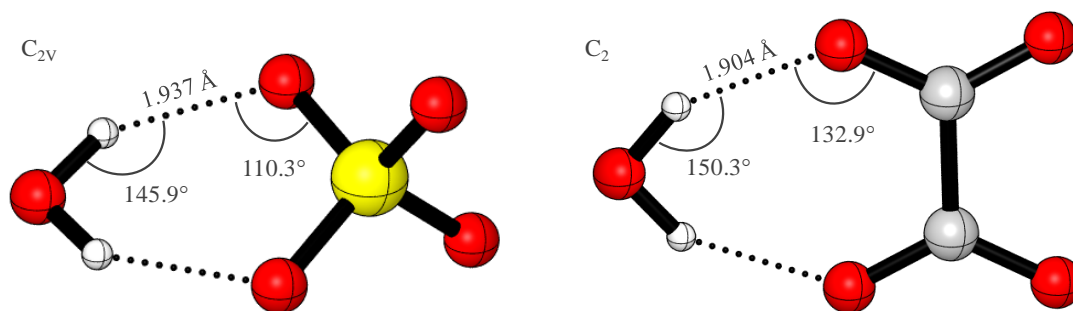

**Fig. S2** Computed structure at the SMD sr-MN15/ACVDZ level of theory for the most stable conformer of  $[\text{SO}_4(\text{H}_2\text{O})_1]^{2-}$  (left) and  $[\text{C}_2\text{O}_4(\text{H}_2\text{O})_1]^{2-}$  (right).

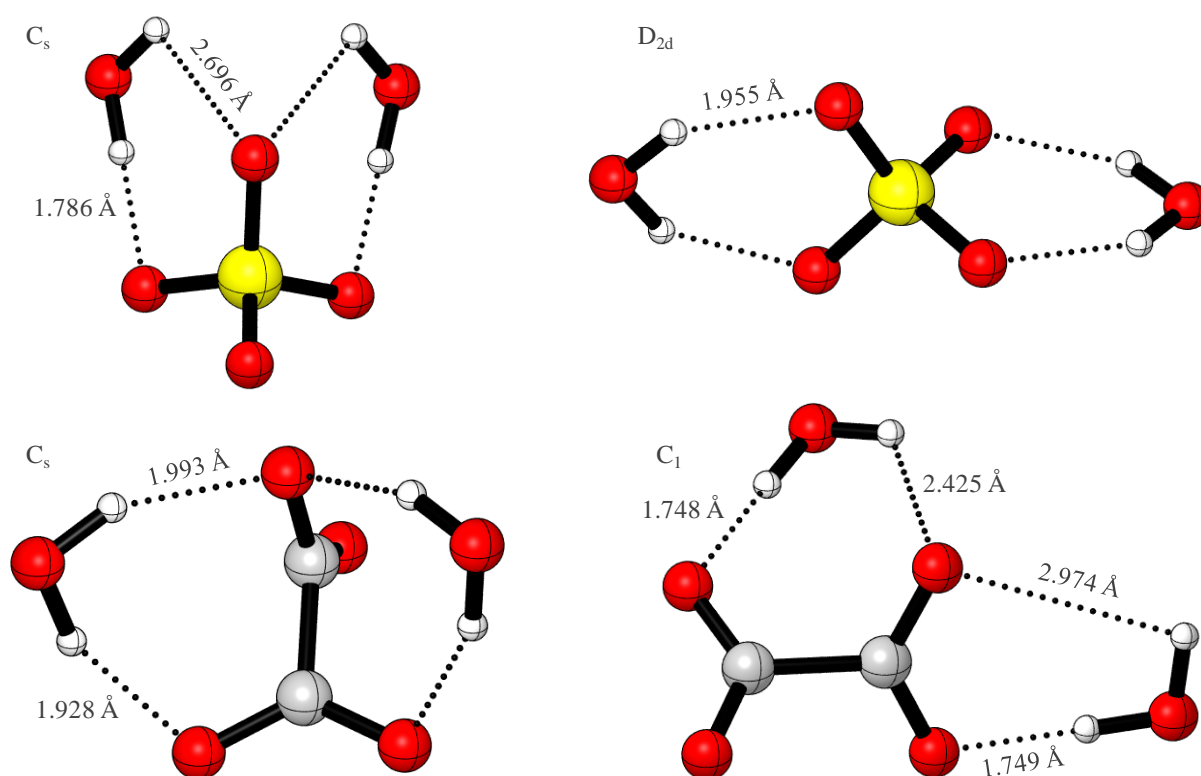

**Fig. S3** Computed structure at the SMD sr-MN15/ACVDZ level of theory for the two most stable conformers of  $[\text{SO}_4(\text{H}_2\text{O})_2]^{2-}$  (top) and  $[\text{C}_2\text{O}_4(\text{H}_2\text{O})_2]^{2-}$  (bottom).

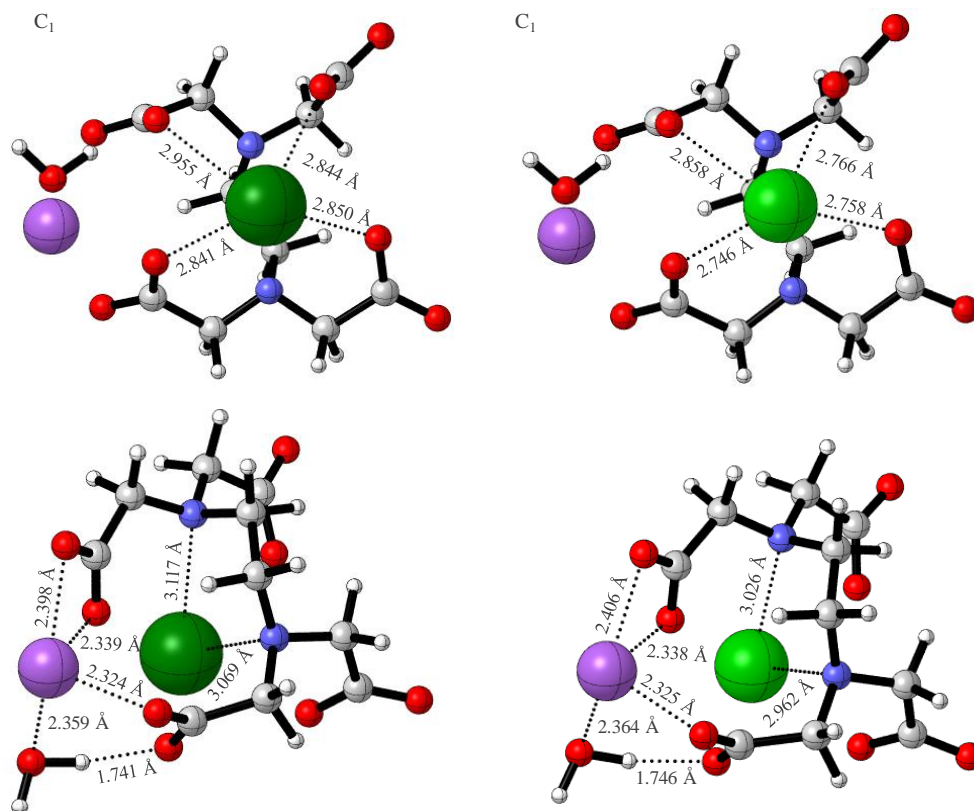

**Fig. S4** Computed structure at the SMD sr-MN15/ACVDZ level of theory for the most stable conformation of [NaEDTA(H<sub>2</sub>O)<sub>1</sub>Na]<sup>-</sup> (left, two views) and [BaEDTA(H<sub>2</sub>O)<sub>1</sub>Na]<sup>-</sup> (right, two views).

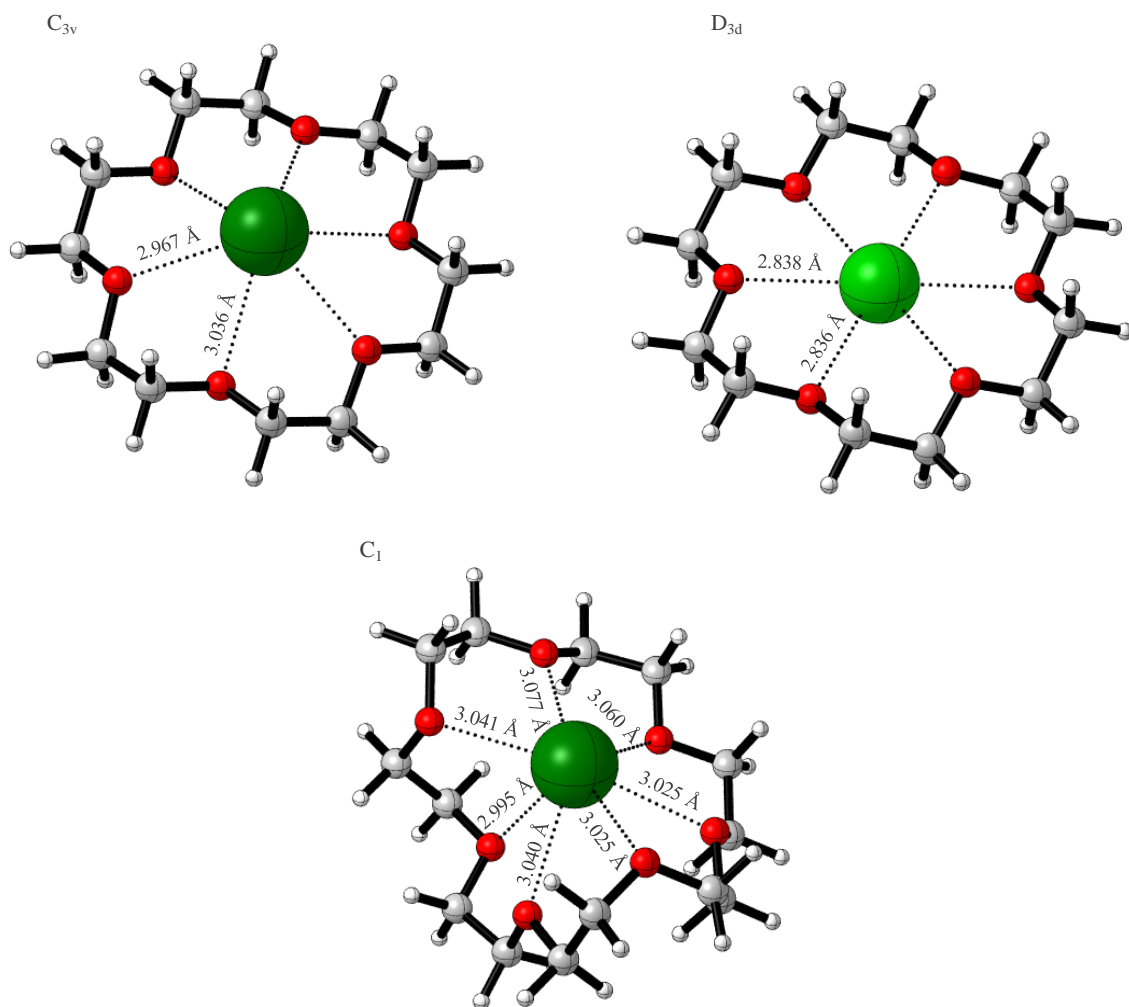

**Fig. S5** Computed structure at the SMD sr-MN15/ACVDZ level of theory for the most stable conformation of  $[Ra \cdots 18C6]^{2+}$  (up left),  $[Ba \cdots 18C6]^{2+}$  (up right) and  $[Ra \cdots 21C7]^{2+}$  (down).

## II. Tables

**Table S1** Absolute percentage error (APE) for computed interaction distances in reference structures using several DFT functionals and the ACVDZ set of basis function

| DFT functional | RaCO <sub>3</sub> | RaSO <sub>4</sub> | [RaH <sub>2</sub> O] <sup>2+</sup> | BIWBAK            |                   |                   | AZELOG            |                   |                   |                   |      |
|----------------|-------------------|-------------------|------------------------------------|-------------------|-------------------|-------------------|-------------------|-------------------|-------------------|-------------------|------|
|                | Ra–O              | Ra–O              | Ra–O                               | Ba–O <sub>1</sub> | Ba–O <sub>2</sub> | Ba–O <sub>3</sub> | Ba–O <sub>1</sub> | Ba–O <sub>2</sub> | Ba–O <sub>3</sub> | Ba–O <sub>4</sub> | Ba–N |
| MN15           | 1.2               | 0.5               | 0.2                                | 3.9               | 3.7               | 0.8               | 3.0               | 0.6               | 2.1               | 0.9               | 0.2  |
| HSE03          | 1.4               | 0.8               | 0.0                                | 3.0               | 3.0               | 1.5               | 1.3               | 0.1               | 4.0               | 1.3               | 0.4  |
| PBE0           | 1.3               | 0.7               | 0.1                                | 3.0               | 3.1               | 1.6               | 1.1               | 0.2               | 4.3               | 1.5               | 0.0  |
| HSE06          | 1.4               | 0.8               | 0.1                                | 3.0               | 3.0               | 1.5               | 1.3               | 0.2               | 4.1               | 1.4               | 0.5  |
| PW6B95         | 1.4               | 0.7               | 0.5                                | 3.2               | 3.3               | 1.2               | 2.3               | 0.7               | 3.2               | 1.2               | 0.1  |
| mPW3PBE        | 1.4               | 0.8               | 0.3                                | 2.7               | 3.3               | 1.8               | 1.0               | 0.4               | 4.6               | 1.7               | 0.6  |
| B3PW91         | 1.5               | 0.9               | 0.5                                | 2.5               | 3.4               | 1.9               | 0.8               | 0.5               | 4.9               | 1.8               | 0.7  |
| TPSSh          | 1.8               | 1.0               | 0.3                                | 2.6               | 3.3               | 1.9               | 0.8               | 0.5               | 4.5               | 1.5               | 0.6  |
| BMK            | 1.1               | 0.9               | 1.0                                | 2.2               | 3.7               | 1.8               | 1.0               | 1.0               | 3.6               | 2.4               | 0.6  |
| M08-HX         | 1.9               | 1.3               | 0.6                                | 3.7               | 3.3               | 0.8               | 2.7               | 0.5               | 2.3               | 1.1               | 0.1  |
| τ-HCTHhyb      | 1.7               | 1.2               | 0.4                                | 2.5               | 3.6               | 2.2               | 1.0               | 0.7               | 5.1               | 2.0               | 1.1  |
| B98            | 1.7               | 1.3               | 0.8                                | 2.1               | 3.9               | 2.4               | 0.3               | 0.8               | 5.5               | 2.3               | 1.2  |
| M06-HX         | 1.2               | 0.9               | 0.3                                | 3.9               | 3.5               | 0.8               | 5.6               | 0.5               | 5.4               | 0.8               | 2.4  |
| B3LYP          | 2.2               | 1.7               | 1.1                                | 1.8               | 3.8               | 2.4               | 0.0               | 0.8               | 5.3               | 2.3               | 1.3  |
| ωB97X          | 1.8               | 1.4               | 0.7                                | 2.6               | 3.4               | 1.6               | 7.9               | 0.2               | 7.5               | 1.9               | 1.1  |

**Table S2** Mean absolute percentage error (MAPE) for computed interaction distances in Ra(II) complexes using the ACVDZ and ACVTZ sets of basis function

| DFT functional | Ra–O  |       |
|----------------|-------|-------|
|                | ACVDZ | ACVTZ |
| MN15           | 0.6   | 0.7   |
| PBE0           | 0.7   | 0.7   |
| PW6B95         | 0.9   | 0.5   |
| M08-HX         | 1.3   | 0.2   |
| B3LYP          | 1.7   | 0.4   |
| ωB97X          | 1.3   | 0.1   |

**Table S3** Computed sr-HF energies and sr-CCSD(T) correlation energies with the ACVXZ basis sets for  $M^{2+}\cdots L$  complexes and their fragments ( $M = \text{Ra}, \text{Ba}$ ;  $L = \text{CO}_3^{2-}, \text{SO}_4^{2-}, \text{H}_2\text{O}$ ), at the optimized sr-CCSD(T)/ACVTZ geometries

|                                            | $X$ | $M^{2+}\cdots L$ |              | $L$        |              | $M^{2+}$  |              |
|--------------------------------------------|-----|------------------|--------------|------------|--------------|-----------|--------------|
|                                            |     | HF (a.u.)        | corr. (a.u.) | HF (a.u.)  | corr. (a.u.) | HF (a.u.) | corr. (a.u.) |
| $\text{Ra}^{2+}\cdots\text{CO}_3^{2-}$     | T   | -286.33278       | -1.21184     | -262.40758 | -0.99728     | -23.17401 | -0.19238     |
|                                            | Q   | -286.35176       | -1.35754     | -262.42395 | -1.11335     | -23.17401 | -0.22022     |
|                                            | 5   | -286.35596       | -1.41402     | -262.42779 | -1.15849     | -23.17405 | -0.22935     |
| $\text{Ra}^{2+}\cdots\text{SO}_4^{2-}$     | T   | -720.88003       | -1.54699     | -697.00524 | -1.32644     | -23.17401 | -0.19238     |
|                                            | Q   | -720.91809       | -1.74140     | -697.04122 | -1.49154     | -23.17401 | -0.22022     |
|                                            | 5   | -720.93496       | -1.92607     | -697.05736 | -1.66484     | -23.17405 | -0.22935     |
| $\text{Ra}^{2+}\cdots\text{H}_2\text{O}^a$ | D   | -99.27010        | -0.34306     | -76.04132  | -0.23473     | -23.17358 | -0.10630     |
|                                            | T   | -99.29111        | -0.49322     | -76.06049  | -0.29704     | -23.17401 | -0.19238     |
|                                            | Q   | -99.29665        | -0.55399     | -76.06587  | -0.32939     | -23.17401 | -0.22022     |
| $\text{Ba}^{2+}\cdots\text{CO}_3^{2-}$     | T   | -287.77220       | -1.23158     | -262.40758 | -0.99728     | -24.59335 | -0.20978     |
|                                            | Q   | -287.79117       | -1.37674     | -262.42395 | -1.11335     | -24.59336 | -0.23667     |
|                                            | 5   | -287.79541       | -1.43293     | -262.42779 | -1.15849     | -24.59336 | -0.24522     |
| $\text{Ba}^{2+}\cdots\text{SO}_4^{2-}$     | T   | -722.31623       | -1.56631     | -697.00524 | -1.32644     | -24.59335 | -0.20978     |
|                                            | Q   | -722.35437       | -1.75997     | -697.04122 | -1.49154     | -24.59336 | -0.23667     |
|                                            | 5   | -722.37128       | -1.94424     | -697.05736 | -1.66484     | -24.59336 | -0.24522     |
| $\text{Ba}^{2+}\cdots\text{H}_2\text{O}^a$ | D   | -100.69393       | -0.35806     | -76.04132  | -0.23473     | -24.59293 | -0.12134     |
|                                            | T   | -100.71478       | -0.51081     | -76.06049  | -0.29704     | -24.59335 | -0.20978     |
|                                            | Q   | -100.72037       | -0.57067     | -76.06587  | -0.32939     | -24.59336 | -0.23667     |

<sup>a</sup> The sr-CCSD(T) iterations failed to converge with the ACV5Z basis set. The complete basis set extrapolation was then performed using energies computed with the ACVDZ, ACVTZ and ACVQZ basis sets.

**Table S4** Absolute percentage error (APE) for calculated energies of exchange reactions (1-4) using several DFT functionals and both ACVDZ and ACVTZ basis sets

| DFT functional  | Basis set | reactions |      |      |      |
|-----------------|-----------|-----------|------|------|------|
|                 |           | 1         | 2    | 3    | 4    |
| $\omega$ B97X   | ACVDZ     | 5.1       | 10.0 | 10.6 | 6.2  |
|                 | ACVTZ     | 0.2       | 2.8  | 2.8  | 2.1  |
| M08-HX          | ACVDZ     | 2.7       | 7.2  | 7.7  | 6.5  |
|                 | ACVTZ     | 1.3       | 5.8  | 5.3  | 1.5  |
| MN15            | ACVDZ     | 8.2       | 8.0  | 10.4 | 8.5  |
|                 | ACVTZ     | 3.1       | 6.0  | 4.6  | 1.3  |
| PW6B95          | ACVDZ     | 1.4       | 16.2 | 19.1 | 15.3 |
|                 | ACVTZ     | 0.9       | 9.1  | 5.0  | 6.8  |
| M06-2X          | ACVDZ     | 1.0       | 10.8 | 9.7  | 9.0  |
|                 | ACVTZ     | 10.2      | 4.7  | 4.4  | 0.9  |
| TPSSh           | ACVDZ     | 0.8       | 22.1 | 26.7 | 23.1 |
|                 | ACVTZ     | 2.6       | 9.5  | 12.2 | 13.6 |
| PBE0            | ACVDZ     | 3.2       | 19.6 | 22.0 | 19.1 |
|                 | ACVTZ     | 6.6       | 7.1  | 7.9  | 10.2 |
| HSE06           | ACVDZ     | 3.3       | 19.3 | 22.1 | 19.8 |
|                 | ACVTZ     | 6.8       | 6.9  | 8.1  | 10.5 |
| B98             | ACVDZ     | 5.6       | 18.9 | 21.4 | 17.4 |
|                 | ACVTZ     | 8.9       | 6.0  | 7.6  | 8.6  |
| HSE03           | ACVDZ     | 3.8       | 20.1 | 22.7 | 20.1 |
|                 | ACVTZ     | 7.6       | 7.6  | 8.7  | 10.9 |
| $\tau$ -HCTHhyb | ACVDZ     | 4.8       | 21.2 | 24.2 | 20.4 |
|                 | ACVTZ     | 7.9       | 7.1  | 9.1  | 10.2 |
| B3PW91          | ACVDZ     | 4.7       | 21.4 | 24.0 | 19.8 |
|                 | ACVTZ     | 7.8       | 8.0  | 9.1  | 10.1 |
| mPW3PBE         | ACVDZ     | 4.6       | 21.5 | 24.2 | 20.7 |
|                 | ACVTZ     | 7.6       | 8.4  | 9.6  | 11.3 |
| B3LYP           | ACVDZ     | 6.6       | 21.0 | 24.5 | 43.7 |
|                 | ACVTZ     | 9.0       | 9.1  | 11.2 | 13.4 |
| BMK             | ACVDZ     | 2.5       | 5.5  | 6.8  | 7.6  |
|                 | ACVTZ     | 15.3      | 14.1 | 7.4  | 16.3 |
| average         | ACVDZ     | 6.4       | 16.2 | 18.4 | 17.2 |
|                 | ACVTZ     | 3.9       | 7.5  | 7.5  | 8.5  |

**Table S5** Absolute error (AE) on calculated values of  $\log K_{\text{exc}}$  for the exchange reactions between  $\text{Ra}^{2+}$  and  $\text{Ba}^{2+}$ 

|                        | DFT functional | Ra Coulomb radius |         |         |         |
|------------------------|----------------|-------------------|---------|---------|---------|
|                        |                | 2.115 Å           | 2.110 Å | 2.105 Å | 2.100 Å |
| L = $\text{HO}^-$      | $\omega$ B97X  | 0.19              | 0.26    | 0.19    | 0.14    |
|                        | M08-HX         | 0.58              | 0.50    | 0.43    | 0.36    |
|                        | MN15           | 0.26              | 0.18    | 0.11    | 0.04    |
|                        | PW6B95         | 0.16              | 0.10    | 0.04    | 0.03    |
| L = $\text{EDTA}^{4-}$ | $\omega$ B97X  | 0.17              | 0.12    | 0.41    | 0.70    |
|                        | M08-HX         | 0.22              | 0.08    | 0.39    | 0.69    |
|                        | MN15           | 0.36              | 0.05    | 0.25    | 0.55    |
|                        | PW6B95         | 0.13              | 0.42    | 0.72    | 1.02    |



**Table S6** Interatomic distances (Å) of the metal coordination environments for the most stable conformation of [M(macropa)(H<sub>2</sub>O)<sub>n</sub>] (M = Ba, Ra and n = 0-3) computed at the SMD sr-MN15/ACVDZ level of theory<sup>a</sup>

|              | M                      | M-N <sub>p</sub> | M-N <sub>p</sub> | M-O <sub>p</sub> | M-O <sub>p</sub> | M-O <sub>c</sub> | M-O <sub>c</sub> | M-O <sub>c</sub> | M-O <sub>c</sub> | M-N <sub>A</sub> | M-N <sub>A</sub> |
|--------------|------------------------|------------------|------------------|------------------|------------------|------------------|------------------|------------------|------------------|------------------|------------------|
| experiment   | Ba                     | 2.933            | 2.929            | 2.784            | 2.808            | 2.881            | 2.847            | 2.884            | 2.833            | 3.015            | 3.006            |
| <i>n</i> = 0 | Ba                     | 2.919            | 2.919            | 2.821            | 2.821            | 2.885            | 2.888            | 2.885            | 2.888            | 3.024            | 3.024            |
|              | deviation <sup>b</sup> | 0.5%             | 0.4%             | 1.3%             | 0.5%             | 0.2%             | 1.5%             | 0.1%             | 2.0%             | 0.3%             | 0.6%             |
|              | Ra                     | 2.980            | 2.980            | 2.902            | 2.902            | 2.917            | 2.939            | 2.917            | 2.939            | 3.044            | 3.044            |
| <i>n</i> = 3 | Ba                     | 2.909            | 2.915            | 2.827            | 2.852            | 2.900            | 2.900            | 2.940            | 2.901            | 3.010            | 3.011            |
|              | deviation <sup>b</sup> | 0.8%             | 0.5%             | 1.5%             | 1.6%             | 0.7%             | 1.9%             | 1.9%             | 2.4%             | 0.1%             | 0.2%             |
|              | Ra                     | 2.971            | 2.980            | 2.914            | 2.939            | 2.930            | 2.934            | 2.965            | 2.937            | 3.045            | 3.031            |

<sup>a</sup> N<sub>p</sub> = pyridyl nitrogen atoms, O<sub>p</sub> = picolinate oxygen atoms, O<sub>c</sub> = crown oxygen atoms, N<sub>A</sub> = amine nitrogen. <sup>b</sup> Absolute deviation with respect to the crystallographic distance in CSD Refcode BINWUT.

### III. Computed structures

Computed structures at the sr-CCSD(T)/ACVTZ level of theory.

Cartesian coordinates (in angstroms).

#### **RaCO<sub>3</sub> (C<sub>2v</sub>)**

C 0.000000 -0.000000 -2.141878  
O 0.000000 -0.000000 -3.354718  
Ra 0.000000 0.000000 0.703981  
O 0.000000 1.120098 -1.391330  
O -0.000000 -1.120098 -1.391330

#### **RaSO<sub>4</sub> (C<sub>3v</sub>)**

S 0.000000 0.000000 -1.866142  
O 0.000000 0.000000 -3.303883  
Ra 0.000000 0.000000 0.970227  
O 0.000000 1.382477 -1.212110  
O -1.197260 -0.691238 -1.212110  
O 1.197260 -0.691238 -1.212110

#### **[RaH<sub>2</sub>O]<sup>2+</sup> (C<sub>2v</sub>)**

O 0.000000 0.000000 -2.403230  
Ra -0.000000 0.000000 0.286743  
H 0.000000 0.758394 -3.003770  
H -0.000000 -0.758394 -3.003770

#### **BaCO<sub>3</sub> (C<sub>2v</sub>)**

C 0.000000 0.000000 -1.829200  
O 0.000000 0.000000 -3.039888  
Ba -0.000000 -0.000000 0.936785  
O -0.000000 1.117073 -1.072855  
O -0.000000 -1.117073 -1.072855

#### **BaSO<sub>4</sub> (C<sub>3v</sub>)**

S 0.000000 0.000000 -1.527011  
O 0.000000 0.000000 -2.963274  
Ba 0.000000 0.000000 1.230808  
O -0.000000 1.379600 -0.866119  
O -1.194769 -0.689800 -0.866119  
O 1.194769 -0.689800 -0.866119

#### **[BaH<sub>2</sub>O]<sup>2+</sup> (C<sub>2v</sub>)**

O 0.000000 0.000000 -2.183718  
Ba -0.000000 0.000000 0.411413  
H -0.000000 0.759188 -2.784692  
H -0.000000 -0.759188 -2.784692

Computed structure at the SMD sr-MN15/ACVDZ level of theory for the most stable conformations of [RaEDTA(H<sub>2</sub>O)<sub>1</sub>Na]<sup>-</sup>.

Geometries (cartesian coordinates in angstroms) and relative stabilities in solution ( $\Delta G_{298}^*$  at 2c-MN15/ACVTZ level of theory) of low-lying conformers.

|                                                         |                                                         |                                 |
|---------------------------------------------------------|---------------------------------------------------------|---------------------------------|
| <b>1:</b> $\Delta G_{298}^* = 0.0 \text{ kJ mol}^{-1}$  | N -0.101018 1.442108 1.446847                           | H 1.094376 -1.104238 3.406811   |
| O 1.948117 1.762790 -0.233529                           | C -1.302400 -2.288742 0.839373                          | H -0.522089 -0.936039 2.730004  |
| O 3.111356 1.047509 1.550721                            | C 0.153160 -2.614221 1.159676                           | C 0.719619 0.802058 2.483048    |
| O -1.493871 2.585836 -0.167935                          | H 0.201299 -3.249669 2.064997                           | H 0.491380 1.226673 3.482593    |
| O -2.834888 3.422839 1.428552                           | H 0.543707 -3.203199 0.313124                           | H 1.774493 1.034787 2.270891    |
| O 1.800086 -1.259812 -0.326559                          | C 2.954764 -2.139847 -0.004888                          | C -2.483843 1.352651 0.634421   |
| O 2.756775 -2.642726 1.140192                           | C 2.366380 -1.687003 1.329240                           | C -1.516871 1.415891 1.807677   |
| O -2.852384 -0.555508 -0.324255                         | H 2.615528 -2.446578 2.097263                           | H -1.796547 2.290871 2.429410   |
| O -4.259020 -2.290102 -0.077949                         | H 2.914838 -0.768378 1.599559                           | H -1.737519 0.529615 2.416574   |
| N -0.237033 0.906307 1.626278                           | C 0.536246 -0.703769 2.537594                           | C 1.728209 2.956945 0.626888    |
| N -0.731343 -2.020633 0.683705                          | H 1.094082 -1.104276 3.407013                           | C 0.340665 2.818834 1.251552    |
| C 2.075165 1.525228 1.011857                            | H -0.522365 -0.935632 2.730263                          | H 0.328239 3.387656 2.203134    |
| C 0.863343 1.848306 1.877605                            | C 0.719756 0.802113 2.483292                            | H -0.358922 3.323872 0.564758   |
| H 1.141746 1.851399 2.948209                            | H 0.491546 1.226811 3.482803                            | O -3.669453 -0.221569 -1.922018 |
| H 0.531675 2.859218 1.598700                            | H 1.774686 1.034619 2.271169                            | H -3.044566 -0.756607 -2.433867 |
| C -1.965478 2.608238 1.009788                           | C -2.483445 1.353048 0.634451                           | H -3.122475 0.499121 -1.529198  |
| C -1.491193 1.551346 2.004553                           | C -1.516615 1.416319 1.807812                           | Na -3.792714 -1.277775 0.263082 |
| H -1.422356 2.013830 3.009203                           | H -1.796163 2.291504 2.429308                           | Ra 0.381357 0.203835 -1.321351  |
| H -2.299649 0.806480 2.053982                           | H -1.737427 0.530223 2.416914                           |                                 |
| C -0.012992 -0.321933 2.401810                          | C 1.728729 2.956455 0.626548                            |                                 |
| H -0.137194 -0.114518 3.484965                          | C 0.341251 2.818805 1.251434                            |                                 |
| H 1.036502 -0.627541 2.265842                           | H 0.329126 3.387746 2.202947                            |                                 |
| C -0.944233 -1.462684 2.026644                          | H -0.358297 3.323962 0.564683                           |                                 |
| H -0.833361 -2.263061 2.786022                          | O -3.668630 -0.221176 -1.922264                         |                                 |
| H -1.986037 -1.117806 2.091685                          | H -3.043452 -0.756853 -2.433096                         |                                 |
| C 1.749439 -2.221999 0.499186                           | H -3.121623 0.499366 -1.529230                          |                                 |
| C 0.413373 -2.928567 0.677083                           | Na -3.792999 -1.276990 0.263354                         |                                 |
| H 0.328438 -3.599473 -0.192991                          | Ra 0.381198 0.203624 -1.321495                          |                                 |
| H 0.447044 -3.561460 1.583512                           |                                                         |                                 |
| C -3.108501 -1.770643 -0.061260                         | <b>3:</b> $\Delta G_{298}^* = +9.8 \text{ kJ mol}^{-1}$ |                                 |
| C -1.944135 -2.710252 0.255659                          | O -1.516614 -1.322809 0.043641                          |                                 |
| H -2.290473 -3.454845 0.999359                          | O -2.228998 -2.978980 1.350050                          |                                 |
| H -1.735009 -3.259377 -0.677061                         | O 2.335070 -1.850261 -1.073609                          |                                 |
| O 4.098244 0.697239 -1.521632                           | O 4.060905 -2.747138 0.049411                           |                                 |
| H 4.817661 1.341439 -1.585224                           | O -2.075640 1.635459 -0.533108                          |                                 |
| H 3.335782 1.181903 -1.110323                           | O -3.668858 0.994776 0.907127                           |                                 |
| Na 3.979691 -0.739136 0.345108                          | O 2.183228 1.991128 -0.062068                           |                                 |
| Ra -0.340191 0.284407 -1.377049                         | O 2.319673 4.056789 0.808196                            |                                 |
|                                                         | N 0.940523 -1.391416 1.302740                           |                                 |
| <b>2:</b> $\Delta G_{298}^* = +8.2 \text{ kJ mol}^{-1}$ | N -0.101300 1.442001 1.446683                           |                                 |
| O -1.516888 -1.322509 0.043726                          | C -1.301990 -2.288982 0.839313                          |                                 |
| O -2.229500 -2.978571 1.350151                          | C 0.153638 -2.614356 1.159464                           |                                 |
| O 2.334897 -1.850539 -1.073582                          | H 0.201882 -3.249869 2.064733                           |                                 |
| O 4.060811 -2.746802 0.049729                           | H 0.544160 -3.203239 0.312839                           |                                 |
| O -2.074985 1.635675 -0.533036                          | C 2.955250 -2.139469 -0.005057                          |                                 |
| O -3.668569 0.995437 0.906986                           | C 2.366814 -1.686885 1.329129                           |                                 |
| O 2.183841 1.990312 -0.061894                           | H 2.616128 -2.446438 2.097129                           |                                 |
| O 2.320442 4.056171 0.807870                            | H 2.915089 -0.768154 1.599448                           |                                 |
| N 0.940132 -1.391334 1.302910                           | C 0.536463 -0.703887 2.537366                           |                                 |

Computed structure at the SMD sr-MN15/ACVDZ level of theory for the most stable conformations of [Ra...18C6]<sup>2+</sup>.

Geometries (cartesian coordinates in angstroms) and relative stabilities in solution ( $\Delta G_{298}^*$  at 2c-MN15/ACVTZ level of theory) of low-lying conformers.

**1:**  $\Delta G_{298}^* = 0.0 \text{ kJ mol}^{-1}$

|             |           |           |              |           |           |             |           |           |
|-------------|-----------|-----------|--------------|-----------|-----------|-------------|-----------|-----------|
| C 0.438008  | -3.595026 | -0.715252 | H -3.466472  | -0.487701 | 1.224496  | H -2.423923 | 2.150753  | 1.961715  |
| O -2.630004 | -0.853950 | -0.577073 | H -4.199155  | 1.146417  | 1.154558  | H -3.460149 | 2.917010  | 0.716350  |
| C -3.627746 | 0.062143  | -0.139980 | C -2.452539  | 1.020103  | 2.380407  | C -1.366371 | 3.222064  | 0.422859  |
| C -3.332499 | 1.416390  | -0.722055 | H -2.156788  | 2.079902  | 2.287047  | H -1.410644 | 3.366309  | -0.672049 |
| O -2.111970 | 1.901094  | -0.176364 | H -3.074313  | 0.907812  | 3.284782  | H -1.427475 | 4.210444  | 0.908461  |
| C -1.753142 | 3.165096  | -0.719949 | C -0.488146  | 0.568666  | 3.600933  | C 0.981805  | 3.387558  | 0.421964  |
| C -0.437531 | 3.596752  | -0.134172 | C -0.488146  | 0.568666  | -3.600933 | H 0.891119  | 4.384486  | 0.884903  |
| O 0.576681  | 2.698234  | -0.570042 | H -0.212477  | 1.635360  | -3.528442 | H 1.018942  | 3.512609  | -0.675590 |
| C 1.868204  | 3.105893  | -0.132641 | H -1.052846  | 0.426232  | -4.538744 | C 2.235641  | 2.721564  | 0.916337  |
| C 2.893801  | 2.175030  | -0.716504 | C -2.452539  | 1.020103  | -2.380407 | H 3.098773  | 3.380625  | 0.722212  |
| O 2.703943  | 0.874651  | -0.173694 | H -3.074313  | 0.907812  | -3.284782 | H 2.169609  | 2.538895  | 2.003231  |
| C 3.619410  | -0.065724 | -0.720837 | H -2.156788  | 2.079902  | -2.287047 | C 3.576147  | 0.797552  | 0.648098  |
| C 3.337004  | -1.422882 | -0.139977 | C -3.244762  | 0.593910  | -1.176307 | H 3.587168  | 0.712311  | 1.748772  |
| O 2.051712  | -1.850445 | -0.576827 | H -4.199155  | 1.146417  | -1.154558 | H 4.473659  | 1.353375  | 0.328705  |
| C 1.757731  | -3.170808 | -0.134349 | H -3.466472  | -0.487701 | -1.224496 | C 3.574822  | -0.572829 | 0.028479  |
| O -0.591712 | -2.778410 | -0.173193 | C 0.729748   | -0.322761 | -3.618961 | H 3.459433  | -0.497984 | -1.069279 |
| C -1.866220 | -3.105178 | -0.711820 | O 1.517013   | -0.198171 | -2.438243 | H 4.528075  | -1.082433 | 0.247096  |
| C -2.896734 | -2.178577 | -0.129800 | C 2.284912   | 0.999048  | -2.381179 | C 2.402189  | -2.626838 | 0.055757  |
| H -3.632408 | 0.109766  | 0.964255  | C 3.180086   | 0.932801  | -1.175541 | H 3.348140  | -3.168814 | 0.221305  |
| H -4.621270 | -0.274286 | -0.480540 | O 2.379966   | 0.959555  | -0.000000 | H 2.207515  | -2.582114 | -1.032580 |
| H -4.155554 | 2.109107  | -0.478023 | C 3.180086   | 0.932801  | 1.175541  | C 1.276446  | -3.334820 | 0.761392  |
| H -3.244956 | 1.347338  | -1.820554 | C 2.284912   | 0.999048  | 2.381179  | H 1.158723  | -4.348799 | 0.344046  |
| H -2.526975 | 3.912968  | -0.477609 | O 1.517013   | -0.198171 | 2.438243  | H 1.485401  | -3.417602 | 1.842220  |
| H -1.672121 | 3.086297  | -1.818233 | C 0.729748   | -0.322761 | 3.618961  | C -1.071195 | -3.191991 | 1.096076  |
| H 1.912067  | 3.085081  | 0.971563  | H 1.628122   | 1.881948  | -2.309286 | H -0.873427 | -3.565557 | 2.114804  |
| H 2.072377  | 4.135085  | -0.472389 | H 2.901516   | 1.088749  | -3.291138 | H -1.367680 | -4.040915 | 0.456218  |
| H 3.904911  | 2.541685  | -0.471293 | H 3.865574   | 1.797365  | -1.181177 | C -2.159428 | -2.153390 | 1.153681  |
| H 2.790647  | 2.135902  | -1.815081 | H 3.782489   | 0.007382  | -1.195371 | H -3.085921 | -2.604182 | 1.546972  |
| H 4.653915  | 0.230157  | -0.477563 | H 3.865574   | 1.797365  | 1.181177  | H -1.848316 | -1.331327 | 1.822795  |
| H 3.510254  | -0.091794 | -1.819162 | H 3.782489   | 0.007382  | 1.195371  | C -3.586025 | -0.931092 | -0.322842 |
| H 3.361790  | -1.382589 | 0.964330  | H 1.628122   | 1.881948  | 2.309286  | H -4.445765 | -1.566380 | -0.050180 |
| H 4.106525  | -2.134928 | -0.482311 | H 2.901516   | 1.088749  | 3.291138  | H -3.651407 | -0.681780 | -1.391321 |
| H -2.125388 | -4.147456 | -0.460020 | H -0.212477  | 1.635360  | 3.528442  | C -3.630458 | 0.332861  | 0.502286  |
| H -1.840704 | -3.004448 | -1.811055 | H -1.052846  | 0.426232  | 4.538744  | H -4.578016 | 0.858899  | 0.292983  |
| H -2.866165 | -2.212658 | 0.974602  | H 0.413842   | -1.374884 | -3.666463 | H -3.596995 | 0.115022  | 1.584164  |
| H -3.900468 | -2.492328 | -0.462222 | H 1.341412   | -0.094054 | -4.507546 | Ra 0.033057 | 0.020008  | -0.810559 |
| H 0.454301  | -3.489840 | -1.814174 | H 1.341412   | -0.094054 | 4.507546  |             |           |           |
| H 0.250060  | -4.653100 | -0.466155 | H 0.413842   | -1.374884 | 3.666463  |             |           |           |
| H -0.487826 | 3.595991  | 0.969924  | Ra -0.026557 | -0.890761 | 0.000000  |             |           |           |
| H -0.203838 | 4.619837  | -0.473568 |              |           |           |             |           |           |
| H 2.545707  | -3.864727 | -0.472087 |              |           |           |             |           |           |
| H 1.718718  | -3.194754 | 0.970064  |              |           |           |             |           |           |
| Ra 0.000063 | 0.002337  | 0.675442  |              |           |           |             |           |           |

**2:**  $\Delta G_{298}^* = +2.6 \text{ kJ mol}^{-1}$

|             |          |           |
|-------------|----------|-----------|
| O -2.495697 | 0.879476 | 0.000000  |
| O -1.291422 | 0.207200 | 2.485723  |
| O -1.291422 | 0.207200 | -2.485723 |

**3:**  $\Delta G_{298}^* = +3.0 \text{ kJ mol}^{-1}$

|             |           |           |
|-------------|-----------|-----------|
| O -2.526653 | 1.154699  | 0.146197  |
| O -0.142077 | 2.586812  | 0.774392  |
| O 2.402169  | 1.485475  | 0.235549  |
| O 2.487041  | -1.306108 | 0.576090  |
| O 0.093097  | -2.574299 | 0.566416  |
| O -2.372276 | -1.659548 | -0.165333 |
| C -2.516292 | 2.371055  | 0.883711  |

Computed structure at the SMD sr-MN15/ACVDZ level of theory for the most stable conformations of [Ra...21C7]<sup>2+</sup>.

Geometries (cartesian coordinates in angstroms) and relative stabilities in solution ( $\Delta G_{298}^*$  at 2c-MN15/ACVTZ level of theory) of low-lying conformers.

|                                                                    |                                                                    |                                                                    |
|--------------------------------------------------------------------|--------------------------------------------------------------------|--------------------------------------------------------------------|
| <b>1: <math>\Delta G_{298}^* = +0.0</math> kJ mol<sup>-1</sup></b> | H 0.104837 -3.862151 0.676087                                      | Ra 0.026683 0.029120 -0.827941                                     |
| O 1.968393 1.748052 0.548880                                       | Ra 0.012814 -0.024747 -0.921937                                    | H 4.575922 -0.319153 -1.887071                                     |
| O 2.976279 -0.103398 -1.289031                                     |                                                                    | H 3.011573 0.331732 -2.467243                                      |
| O 1.805552 -1.960689 0.529522                                      | <b>2: <math>\Delta G_{298}^* = +2.5</math> kJ mol<sup>-1</sup></b> | H -2.892292 1.276269 -2.295163                                     |
| C 1.745065 1.997101 1.931159                                       | O 0.197831 2.265407 1.353061                                       | H -4.527459 0.629737 -1.954722                                     |
| H 2.352154 2.854683 2.266044                                       | O -2.248156 1.592988 0.265562                                      |                                                                    |
| H 2.032496 1.108750 2.522785                                       | O 2.504708 1.561933 -0.098637                                      | <b>3: <math>\Delta G_{298}^* = +2.8</math> kJ mol<sup>-1</sup></b> |
| C 3.343617 1.803112 0.193071                                       | C -0.880339 1.850944 2.182439                                      | O -2.153654 -1.816572 0.264022                                     |
| H 3.949178 1.243601 0.927006                                       | H -0.805437 2.327617 3.174203                                      | C -3.510252 -1.462108 0.020450                                     |
| H 3.697307 2.848520 0.191527                                       | H -0.835335 0.751304 2.315877                                      | C -3.610934 -0.801042 -1.332356                                    |
| C 3.490787 1.221827 -1.192898                                      | C -2.181502 2.231276 1.531436                                      | O -2.899151 0.434617 -1.370801                                     |
| H 2.907771 1.820671 -1.908478                                      | H -3.011826 1.885794 2.171460                                      | C -3.544951 1.502898 -0.678859                                     |
| H 4.551549 1.244053 -1.492448                                      | H -2.261129 3.324968 1.407185                                      | C -1.307509 1.880628 2.174774                                      |
| C 3.723859 -1.102079 -0.600133                                     | C -3.560897 1.542493 -0.269052                                     | C -0.162843 2.804356 1.842555                                      |
| H 4.764467 -0.768587 -0.456659                                     | C 3.768787 1.252547 -0.666215                                      | C 1.879926 2.911133 0.675328                                       |
| H 3.731744 -1.996132 -1.241700                                     | H 4.487809 1.036770 0.142241                                       | C 3.135336 2.114766 0.455129                                       |
| C 3.121780 -1.464213 0.737073                                      | H 4.164525 2.095952 -1.256436                                      | C 4.016022 0.240089 -0.662975                                      |
| H 3.744599 -2.247459 1.204787                                      | C 2.563574 2.406956 1.043977                                       | C 3.553740 -1.075898 -1.244525                                     |
| H 3.084973 -0.602286 1.424177                                      | H 2.482024 3.464420 0.741397                                       | C 1.693426 -2.683128 1.484602                                      |
| C 1.203352 -2.373665 1.751102                                      | H 3.522755 2.261775 1.567394                                       | O 0.436729 -2.023702 1.377658                                      |
| O -1.040366 -2.154349 0.956539                                     | C 1.450954 2.026250 1.982336                                       | C -0.630245 -2.879533 1.765576                                     |
| C -2.165780 -2.814192 0.383581                                     | H 1.534617 0.950884 2.235244                                       | C -1.938338 -2.152839 1.630014                                     |
| C -3.305200 -1.839586 0.279902                                     | H 1.524885 2.614833 2.912535                                       | H -3.859294 -0.778511 0.814448                                     |
| O -2.914706 -0.746737 -0.538454                                    | C 3.585963 0.051735 -1.571693                                      | H -4.145205 -2.364559 0.041775                                     |
| C -3.912723 0.262370 -0.586020                                     | O 2.834157 -0.985213 -0.948731                                     | H -4.670157 -0.645432 -1.593608                                    |
| C -3.306729 1.516190 -1.168197                                     | C 3.361133 -1.444099 0.289860                                      | H -3.153384 -1.446468 -2.096407                                    |
| O -2.181762 1.972793 -0.419854                                     | C 2.463025 -2.536803 0.798012                                      | H -4.325888 1.106139 -0.012353                                     |
| C -2.467369 2.401882 0.910576                                      | O 1.187781 -1.980853 1.103548                                      | H -4.015637 2.187716 -1.401618                                     |
| C -1.898564 1.425795 1.922702                                      | C 0.315628 -2.967732 1.641815                                      | H -0.944898 1.037473 2.781789                                      |
| O -0.499469 1.213998 1.742430                                      | C -1.033717 -2.362790 1.909329                                     | H -2.062710 2.439697 2.753098                                      |
| C 0.292929 2.331459 2.130352                                       | O -1.633022 -2.001419 0.671470                                     | H 0.217156 3.258514 2.773723                                       |
| H -2.478922 -3.654105 1.025802                                     | C -2.978146 -1.562811 0.828513                                     | H -0.495590 3.621379 1.178607                                      |
| H -1.893344 -3.213424 -0.609470                                    | C -3.596606 -1.441454 -0.545514                                    | H 2.102845 3.721855 1.388543                                       |
| H -3.573791 -1.465477 1.284678                                     | O -2.890486 -0.525850 -1.379893                                    | H 1.524257 3.361001 -0.268580                                      |
| H -4.185922 -2.346770 -0.149548                                    | C -3.507667 0.747020 -1.552398                                     | H 3.462430 1.661098 1.408468                                       |
| H -4.293578 0.448102 0.434513                                      | H 3.386712 -0.624707 1.029461                                      | H 3.933270 2.784213 0.091212                                       |
| H -4.763555 -0.061157 -1.210012                                    | H 4.383618 -1.833551 0.151109                                      | H 4.508328 0.085408 0.312391                                       |
| H -4.077126 2.302821 -1.225645                                     | H 2.903182 -2.982121 1.706210                                      | H 4.752047 0.703543 -1.341301                                      |
| H -2.930717 1.316238 -2.182918                                     | H 2.348469 -3.329539 0.038107                                      | H 4.411779 -1.767698 -1.294056                                     |
| H -3.553419 2.494758 1.069067                                      | H 0.733372 -3.360664 2.584342                                      | H 3.155090 -0.929858 -2.258923                                     |
| H -2.029532 3.402823 1.040245                                      | H 0.218967 -3.804023 0.927124                                      | H 1.920753 -2.891900 2.543493                                      |
| H -2.370527 0.438332 1.811770                                      | H -0.939786 -1.475340 2.561042                                     | H 1.653845 -3.640167 0.936014                                      |
| H -2.092584 1.799157 2.943342                                      | H -1.663431 -3.107297 2.425459                                     | H -0.496799 -3.195035 2.814425                                     |
| C -0.081116 -3.088255 1.441048                                     | H -2.998776 -0.608119 1.384101                                     | H -0.628055 -3.779651 1.125975                                     |
| H 1.880258 -3.061403 2.285444                                      | H -3.547615 -2.311879 1.406275                                     | H -1.944555 -1.233947 2.245022                                     |
| H 1.016219 -1.493681 2.395173                                      | H -4.653085 -1.143017 -0.452998                                    | H -2.743600 -2.816986 1.985976                                     |
| H 0.039457 3.214780 1.522060                                       | H -3.556804 -2.424034 -1.039575                                    | O -1.909821 1.303842 1.020898                                      |
| H 0.109438 2.568153 3.191992                                       | H -4.239914 1.074268 0.466764                                      | O 0.870061 2.058674 1.208819                                       |
| H -0.465871 -3.578913 2.350678                                     | H -3.937270 2.557417 -0.483641                                     | O 2.885464 1.083005 -0.488936                                      |

O 2.490681 -1.656317 -0.492764  
 C 2.755963 -1.796501 0.898846  
 C -2.515932 2.243922 0.136522  
 Ra 0.039511 -0.037616 -0.826166  
 H -3.002051 3.053392 0.706135  
 H -1.752748 2.691371 -0.527256  
 H 3.747175 -2.252789 1.058055  
 H 2.731645 -0.808445 1.395905

**4:  $\Delta G_{298}^* = +3.9 \text{ kJ mol}^{-1}$**

O 2.278534 1.815643 0.054357  
 O -0.216247 2.429562 1.229425  
 O -2.531728 1.650210 -0.225336  
 O -2.780890 -1.059590 -0.941396  
 O -1.190611 -2.304310 1.006443  
 O 1.612649 -2.363782 0.569098  
 O 2.841621 -0.620983 -1.334184  
 C 2.180386 2.369457 1.361569  
 H 3.055312 3.006362 1.571422  
 H 2.148397 1.557166 2.110399  
 C 0.946344 3.225219 1.432583  
 H 0.894134 3.719948 2.417459  
 H 0.994446 4.004896 0.651933  
 C -1.368305 3.256316 1.112135  
 H -1.256309 3.915958 0.233495  
 H -1.466383 3.889038 2.011044  
 C -2.606649 2.417026 0.971634  
 H -2.726915 1.740530 1.836557  
 H -3.475371 3.095104 0.932572  
 C -3.801340 1.133933 -0.608236  
 H -4.387816 1.905848 -1.134820  
 H -4.368027 0.837020 0.290033  
 C -3.588568 -0.043779 -1.529739  
 H -4.569098 -0.457130 -1.821680  
 H -3.053542 0.277441 -2.435291  
 C -3.329540 -1.624458 0.244147  
 H -4.364563 -1.958754 0.060872  
 H -3.331932 -0.883041 1.062008  
 C -2.476614 -2.793731 0.649141  
 H -2.938416 -3.302257 1.512373  
 H -2.385297 -3.517150 -0.179864  
 C -0.347057 -3.334756 1.502026  
 H -0.259867 -4.139929 0.751350  
 H -0.775979 -3.760579 2.424984  
 C 1.006615 -2.752738 1.795874  
 H 0.909521 -1.874149 2.460144  
 H 1.632644 -3.507195 2.301401  
 C 2.914022 -1.826162 0.771719  
 H 3.526679 -2.537729 1.352444  
 H 2.837836 -0.880303 1.342297  
 C 3.553445 -1.597289 -0.574621  
 H 4.599626 -1.283918 -0.433591  
 H 3.547639 -2.539748 -1.144052  
 C 3.547516 0.600403 -1.541437  
 H 3.000904 1.143427 -2.326560  
 H 4.568983 0.393769 -1.899769

C 3.606723 1.443117 -0.291634  
 H 4.072842 0.881870 0.537345  
 H 4.215371 2.344266 -0.479642  
 Ra -0.024697 -0.014547 -0.552762

**5:  $\Delta G_{298}^* = +5.5 \text{ kJ mol}^{-1}$**

O -2.707896 -0.716820 1.279412  
 C -3.268623 0.517808 1.718502  
 C -3.410133 1.522100 0.598164  
 O -2.155800 1.631841 -0.057282  
 C -2.191215 2.483063 -1.194041  
 C -1.306396 -3.003253 -1.048799  
 O -1.587396 -1.612302 -1.183451  
 C -2.974517 -1.301099 -1.074972  
 C -3.494340 -1.452017 0.344179  
 H -2.575176 0.902236 2.481885  
 H -4.252687 0.351136 2.186892  
 H -3.722211 2.493857 1.017430  
 H -4.176783 1.202803 -0.130923  
 H -2.104332 3.536390 -0.876165  
 H -3.149376 2.363111 -1.728417  
 H -3.557191 -1.963732 -1.738786  
 H -3.084579 -0.268195 -1.431947  
 H -3.460890 -2.507224 0.653970  
 H -4.547128 -1.127213 0.381210  
 C 3.783539 0.138405 0.725632  
 H 4.835813 -0.187377 0.776660  
 H 3.353936 0.093185 1.744450  
 C 3.716647 1.538492 0.177652  
 H 4.328078 2.216357 0.796079  
 H 4.108435 1.549800 -0.853838  
 C 2.121260 3.075797 -0.674046  
 H 2.620405 2.912186 -1.644539  
 H 2.521304 3.997103 -0.218776  
 C 0.635188 3.201636 -0.883020  
 H 0.121257 3.355202 0.083306  
 H 0.426433 4.062960 -1.538903  
 C 2.355768 -2.890439 -0.783880  
 H 2.594555 -2.614285 -1.825825  
 H 2.560100 -3.965990 -0.649001  
 C 3.201909 -2.089379 0.167325  
 H 2.884849 -2.275527 1.210276  
 H 4.259480 -2.384158 0.063766  
 H -1.458246 -3.331072 -0.006184  
 H -1.978061 -3.582926 -1.704020  
 C -1.077161 2.077034 -2.132487  
 C 0.120499 -3.256244 -1.452117  
 O 0.984714 -2.620707 -0.518718  
 O 3.044931 -0.710598 -0.145586  
 O 2.357617 1.954704 0.167486  
 O 0.188988 1.991737 -1.489064  
 Ra 0.168897 -0.047710 0.693432  
 H -1.031569 2.791559 -2.972132  
 H -1.274952 1.069466 -2.528503  
 H 0.307726 -4.343518 -1.455456  
 H 0.312094 -2.861947 -2.465432

**6:  $\Delta G_{298}^* = +6.5 \text{ kJ mol}^{-1}$**

O -3.014318 -0.960524 0.139231  
 C -3.853016 0.005294 0.759908  
 C -3.826439 1.258455 -0.067836  
 O -2.534697 1.848460 0.015650  
 C -2.399231 2.928227 -0.899863  
 C -1.160927 3.711828 -0.571933  
 O -0.007775 2.898820 -0.751924  
 C 1.175183 3.656681 -0.530900  
 C 2.381620 2.765798 -0.617599  
 O 2.332937 1.812460 0.437566  
 C 3.611041 1.252362 0.712502  
 C 3.426444 0.061137 1.618416  
 O 2.710185 -0.985805 0.967696  
 C 3.465727 -1.689100 -0.017456  
 C 2.765915 -1.595481 -1.356191  
 O 1.404725 -2.010352 -1.290466  
 C 1.226466 -3.360134 -0.877637  
 C -0.233117 -3.697419 -0.992965  
 O -0.956225 -2.876397 -0.085609  
 C -2.332877 -3.225589 -0.044684  
 C -3.068254 -2.220404 0.795889  
 H -3.499373 0.211004 1.786572  
 H -4.886657 -0.375896 0.815162  
 H -4.585842 1.967704 0.302414  
 H -4.057389 1.013610 -1.119506  
 H -3.270395 3.600124 -0.817797  
 H -2.354710 2.538505 -1.932145  
 H -1.200585 4.069014 0.472337  
 H -1.105793 4.590116 -1.237894  
 H 1.130128 4.125627 0.468036  
 H 1.253168 4.455845 -1.287905  
 H 3.283019 3.392884 -0.517919  
 H 2.422276 2.244691 -1.591272  
 H 4.253770 2.002731 1.204121  
 H 4.097618 0.948677 -0.231969  
 H 2.828854 0.350832 2.495254  
 H 4.407526 -0.301716 1.964736  
 H 3.582313 -2.734863 0.306964  
 H 4.475364 -1.262193 -0.120883  
 H 3.311375 -2.197797 -2.103639  
 H 2.740382 -0.544611 -1.687631  
 H 1.545530 -3.490516 0.170081  
 H 1.819140 -4.034956 -1.518193  
 H -0.382252 -4.761273 -0.741442  
 H -0.594999 -3.524044 -2.021616  
 H -2.454371 -4.233841 0.386450  
 H -2.745124 -3.229497 -1.069089  
 H -2.612031 -2.143241 1.799669  
 H -4.117699 -2.539514 0.911641  
 Ra -0.111740 0.033402 0.250005



N 2.112481 2.010252 -1.193565  
Ra -0.031662 -0.077743 -0.235407
